# Supplementary material
Source: Springer Nature journal article supplement (https://www.springermedizin.de/resource/supplementary/12911_2012_603_MOESM6_ESM.pdf/9526210)

Prostate cancer - Males

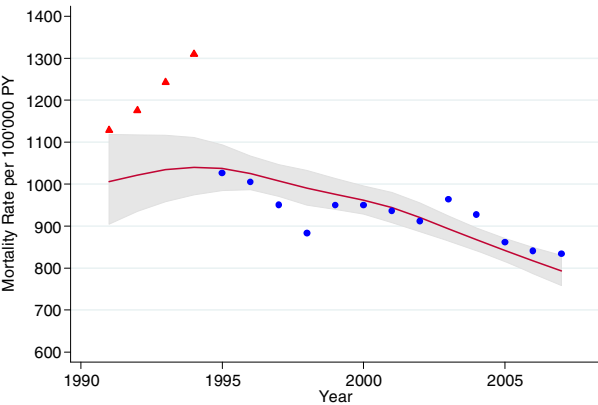

Breast cancer - Females

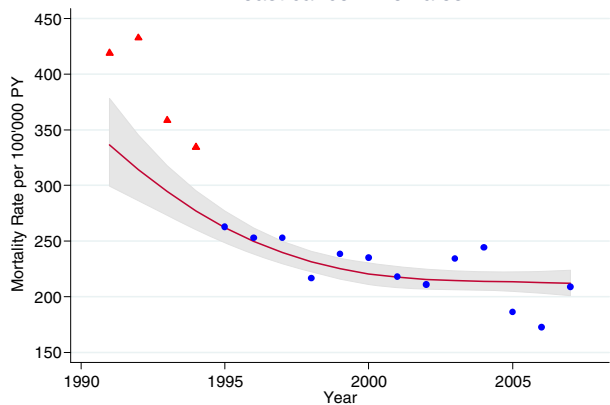

All Cancer - Males

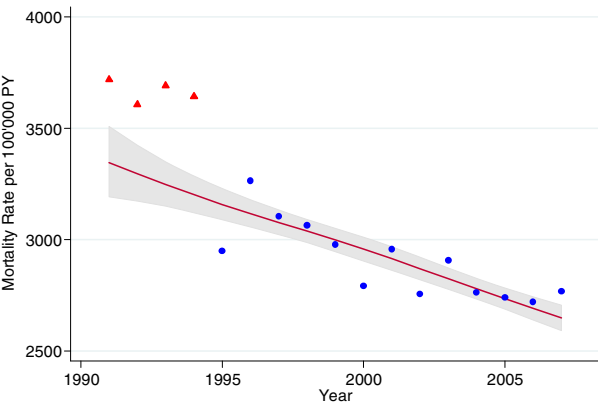

All Cancer - Females

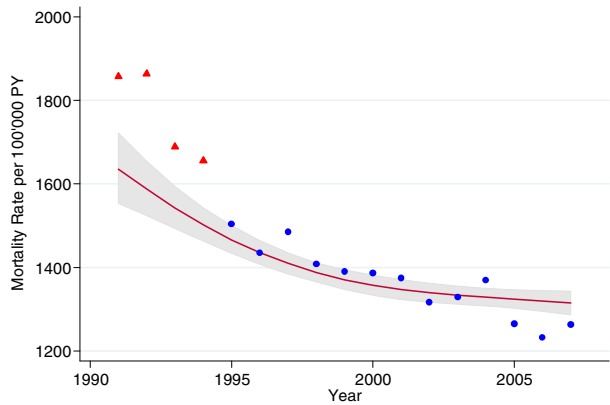

Suicide - Males

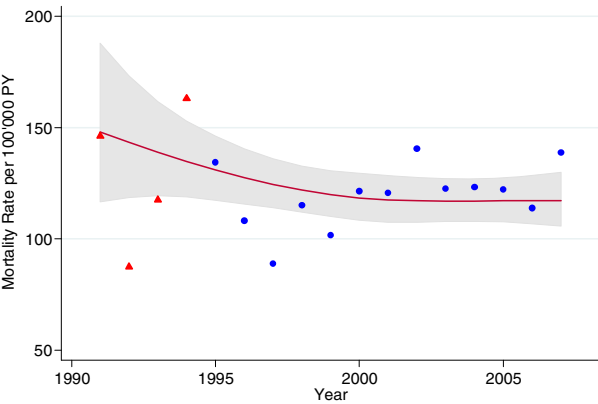

Suicide - Females

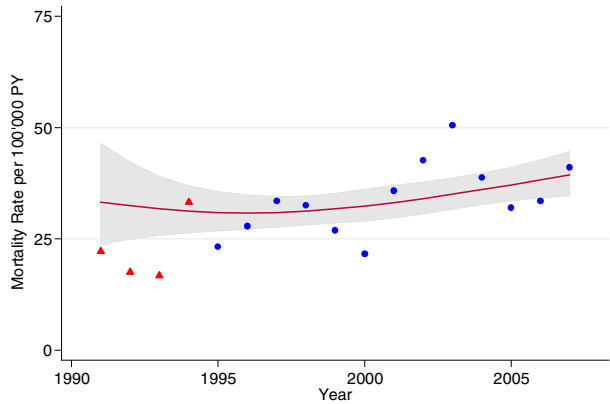

Supplement: MOESM6 [file 9526210]
